# Supplementary material for: The Cost-effectiveness of Enhanced Recovery after Surgery Protocols in Abdominally Based Autologous Breast Reconstruction
Source: PubMed Central journal article supplement — Plast Reconstr Surg Glob Open. 2024 May 6;12(5):e5793. doi: 10.1097/GOX.0000000000005793 (PMC11073775; doi:10.1097/gox.0000000000005793), 2024-05-06
Supplement: gox-12-e5793-s001.pdf [file gox-12-e5793-s001.pdf]

SDC 1. Characteristics and Quality Assessment of Included Studies.

| Paper                     | Study Type                   | Intervention                                         | Sample Description                                                                                                                                                               | Quality  | Risk of Bias Rating |
|---------------------------|------------------------------|------------------------------------------------------|----------------------------------------------------------------------------------------------------------------------------------------------------------------------------------|----------|---------------------|
| Afonso et al., 2017       | Retrospective case control   | ERP vs. control                                      | DIEP or MS-TRAM flap patients<br><br>ERP: n = 42<br><br>Control: n = 49                                                                                                          | High     | Low                 |
| Clary et al., 2020        | Non-randomized control trial | TAP with liposomal bupivacaine vs. thoracic epidural | DIEP flap breast reconstruction patients (abdominal donor site)<br><br>TAP with liposomal bupivacaine: n = 15<br><br>Thoracic epidural: n = 15                                   | Low      | Serious             |
| Gatherwright et al., 2018 | Prospective cohort           | Analgesia regimens                                   | Unilateral DIEP reconstruction for breast cancer<br><br>Liposomal Bupivacaine: 8 patients<br><br>Bupivacaine: 8 patients<br><br>OnQ Pump: 5 patients<br><br>Controls: 6 patients | Moderate | Low                 |
| Hwang et al., 2000        | Retrospective cohort         | Clinical Pathway vs. Control                         | TRAM flap Patients<br><br>Control: n = 40<br><br>Clinical Pathway: n = 29                                                                                                        | High     | Low                 |
| Jablonka et al., 2017     | Retrospective case control   | Analgesia regimens                                   | Breast reconstruction using abdominally-based free flaps<br><br>Control: n = 40<br><br>TAP catheter: n = 48                                                                      | Low      | Serious             |

|                         |                                   |                                              |                                                                                                                              |          |          |
|-------------------------|-----------------------------------|----------------------------------------------|------------------------------------------------------------------------------------------------------------------------------|----------|----------|
|                         |                                   |                                              | TAP liposomal bupivacaine:<br>n = 40                                                                                         |          |          |
| Kaoutzanis et al., 2018 | Retrospective cohort              | ERP vs. control                              | Autologous tissue-based breast reconstruction patients<br><br>Control: n = 50<br><br>ERP: n = 50                             | High     | Low      |
| Knackstedt et al., 2017 | Retrospective cohort              | Liposomal Bupivacaine vs OnQ catheter        | Unilateral DIEP reconstruction<br><br>Liposomal Bupivacaine (TAP block): n = 6<br><br>Bupivacaine pain catheter OnQ: n = 6   | Low      | Serious  |
| O'Neill et al., 2020    | Retrospective cohort              | ERAS vs. Control                             | DIEP flap patients<br><br>Controls: n = 183<br><br>ERAS: n = 198                                                             | Moderate | Moderate |
| Oh et al., 2018         | Retrospective cohort              | ERAS vs. control                             | Free-flap breast reconstruction patients (abdominal donor site)<br><br>ERAS: n = 82<br><br>Control: n = 118                  | High     | Moderate |
| Salibian et al., 2018   | Retrospective chart review/cohort | Liposomal bupivacaine TAP block vs. controls | Abdominally-based microvascular breast reconstruction<br><br>Controls: n = 64<br><br>Liposomal bupivacaine TAP Block: n = 50 | High     | Moderate |
| Stein et al., 2019      | Prospective cohort                | ERAS vs. control                             | Latissimus dorsi flap patients<br><br>Controls: n = 58<br><br>ERAS: n = 20                                                   | Moderate | Moderate |
