# Supplementary material for: The Cost-effectiveness of Enhanced Recovery after Surgery Protocols in Abdominally Based Autologous Breast Reconstruction
Source: PubMed Central journal article supplement — Plast Reconstr Surg Glob Open. 2024 May 6;12(5):e5793. doi: 10.1097/GOX.0000000000005793 (PMC11073775; doi:10.1097/gox.0000000000005793), 2024-05-06
Supplement: gox-12-e5793-s002.pdf [file gox-12-e5793-s002.pdf]

SDC 2. Primary Outcomes

| <b>Authors</b>           | <b>Cost</b>                                                                                                                                                      | <b>Length of Stay (days)</b>                                                                        | <b>ICER (\$/day)</b>                                |
|--------------------------|------------------------------------------------------------------------------------------------------------------------------------------------------------------|-----------------------------------------------------------------------------------------------------|-----------------------------------------------------|
| Afonso et al. (2017)     | _____                                                                                                                                                            | ERP: median 4.0 days (range: 3.0-5.0 days)<br><br>Control: median 5.0 days (range: 4.0-6.0 days)    | _____                                               |
| Hwang et al. (2000)      | Total Charges: Control (\$8587) vs. Clinical Pathway (\$7744) (p=0.196)<br><br>Total Relative Value units: Control (1686) vs. Clinical Pathway (1104) (p=0.0004) | Clinical Pathway: 5.24 days (p=0.026)<br><br>Control: 6.05 days                                     | 1040.74                                             |
| Jablonka et al. (2017)   | _____                                                                                                                                                            | TAP Block: 2.65 days (p<0.0001 when compared to other analgesia regimens)<br><br>Control: 4.05 days | _____                                               |
| Kauotzanis et al. (2018) | \$4400 saved per patient based on LOS costs. Extrapolated \$279,258 savings and increase in contribution margins of \$189,342                                    | ERP: 3.0 days +/- 0.6 days (p<0.01)<br><br>Control: Mean and SD: 4.7 +/- 2.3 days                   | 2588.24                                             |
| Oh et al. (2018)         | ERAS: \$38,688<br><br>Control: \$43,264                                                                                                                          | ERAS: 3.9 days<br><br>Control: 5.5 days                                                             | 2860                                                |
| O'Neill et al. (2020)    | Unilateral DIEP ERAS protocol: 2,821 CAD\$ (p=0.001)                                                                                                             | ERAS Protocol: 3.6 days (p=0.006)<br><br>Control: 4.7 days                                          | Unilateral DIEP: 1010<br><br>Bilateral DIEP: 952.73 |

|                        |                                                                                                                                                                   |                                                              |         |
|------------------------|-------------------------------------------------------------------------------------------------------------------------------------------------------------------|--------------------------------------------------------------|---------|
|                        | <p>Unilateral DIEP control:<br/>3,932 CAD\$</p> <p>Bilateral DIEP ERAS<br/>protocol: 3,296 CAD\$<br/>(p=0.003)</p> <p>Bilateral DIEP control:<br/>4,344 CAD\$</p> |                                                              |         |
| Stein et al.<br>(2019) | <p>ERAS: \$5666.80 (p=0.0003)</p> <p>Control: \$8890.25</p>                                                                                                       | <p>ERAS: 0.3 days<br/>(p=0.003)</p> <p>Control: 2.4 days</p> | 1534.98 |
