# Supplementary material for: The Cost-effectiveness of Enhanced Recovery after Surgery Protocols in Abdominally Based Autologous Breast Reconstruction
Source: PubMed Central journal article supplement — Plast Reconstr Surg Glob Open. 2024 May 6;12(5):e5793. doi: 10.1097/GOX.0000000000005793 (PMC11073775; doi:10.1097/gox.0000000000005793), 2024-05-06
Supplement: gox-12-e5793-s003.pdf [file gox-12-e5793-s003.pdf]

SDC 3. Secondary Outcomes

| <b>Paper</b>               | <b>Cost</b>                                                                                              | <b>Length of Stay (LOS)</b>                                                                              | <b>ICER (\$/day)</b>                                                             |
|----------------------------|----------------------------------------------------------------------------------------------------------|----------------------------------------------------------------------------------------------------------|----------------------------------------------------------------------------------|
| Clary et al. (2020)        | _____                                                                                                    | TAP Block: 3.53 days<br><br>Thoracic epidural: 4.33 days                                                 | _____                                                                            |
| Gatherwright et al. (2018) | TAP Block: \$3215.16<br><br>Bupivacaine: \$3153.55<br><br>OnQ Pump: \$3686.21<br><br>Controls: \$3255.50 | TAP Block: 3.38 days<br><br>Bupivacaine: 3.63 days<br><br>OnQ Pump: 3.80 days<br><br>Controls: 3.83 days | Liposomal Bupivacaine: 89.64<br><br>Bupivacaine: 509.75<br><br>OnQ Pump: -14,357 |
| Knackstedt et al.          | TAP block: \$3720.96<br><br>Bupivacaine pain catheter OnQ: \$3655.95                                     | TAP block: 4 days<br><br>Bupivacaine pain catheter OnQ: 4 days                                           | _____                                                                            |
| Salibian et al. (2018)     | TAP Block: \$21531.53 (p=0.5659)<br><br>Controls: \$22050.15                                             | TAP Block: 3.9 days (p=0.1608)<br><br>Controls: 4.2 days                                                 | 1728.73                                                                          |
